# Supplementary material for: Approximations to the Voice of a Cochlear Implant: Explorations With Single-Sided Deaf Listeners
Source: PubMed Central journal article supplement — Trends Hear. 2020 Apr 27;24:2331216520920079. doi: 10.1177/2331216520920079 (PMC7225791; doi:10.1177/2331216520920079), 2020-04-27
Supplement: sj-pdf-1-tia-10.1177_2331216520920079.pdf [file sj-pdf-1-tia-10.1177_2331216520920079.pdf]

Supplemental Material 1. Video of first patient matching the sound quality of her CI.

[https://www.dropbox.com/s/y1uyg9vx33dtumn/Approximations\\_Supplemental\\_1.mp4?dl=0](https://www.dropbox.com/s/y1uyg9vx33dtumn/Approximations_Supplemental_1.mp4?dl=0)

Supplemental Material 2. Audio file of a sound quality match for a patient fit with a Cochlear Corporation device tested at the University Medical Center, Utrecht, The Netherlands. The match was rated as a 9.8.

[https://www.dropbox.com/s/zowi2fayx2fqmof/Approximations\\_Supplemental\\_2.wav?dl=0](https://www.dropbox.com/s/zowi2fayx2fqmof/Approximations_Supplemental_2.wav?dl=0)

Supplemental Material 3. Audio files of 9.5 matches from listeners tested at The World Hearing Center in Kajetany, Poland.

[https://www.dropbox.com/s/75ksbyqf9eb8g31/Approximations\\_supplemental\\_3.wav?dl=0](https://www.dropbox.com/s/75ksbyqf9eb8g31/Approximations_supplemental_3.wav?dl=0)

Supplemental Material 4. Video of matching procedure for a patient using a MED-EL CI.

[https://www.dropbox.com/s/2xalvo3d5zo5y2y/Approximations\\_Supplemental\\_4.mp4?dl=0](https://www.dropbox.com/s/2xalvo3d5zo5y2y/Approximations_Supplemental_4.mp4?dl=0)

Supplemental Material 5. Audio files of the sound quality matches for all of the patients in the present study.

[https://www.dropbox.com/s/xz4sl7cl36f7zob/Approximations\\_Supplemental\\_5.wav?dl=0](https://www.dropbox.com/s/xz4sl7cl36f7zob/Approximations_Supplemental_5.wav?dl=0)
